# Supplementary material
Source: PubMed Central journal article supplement (PMC33394)

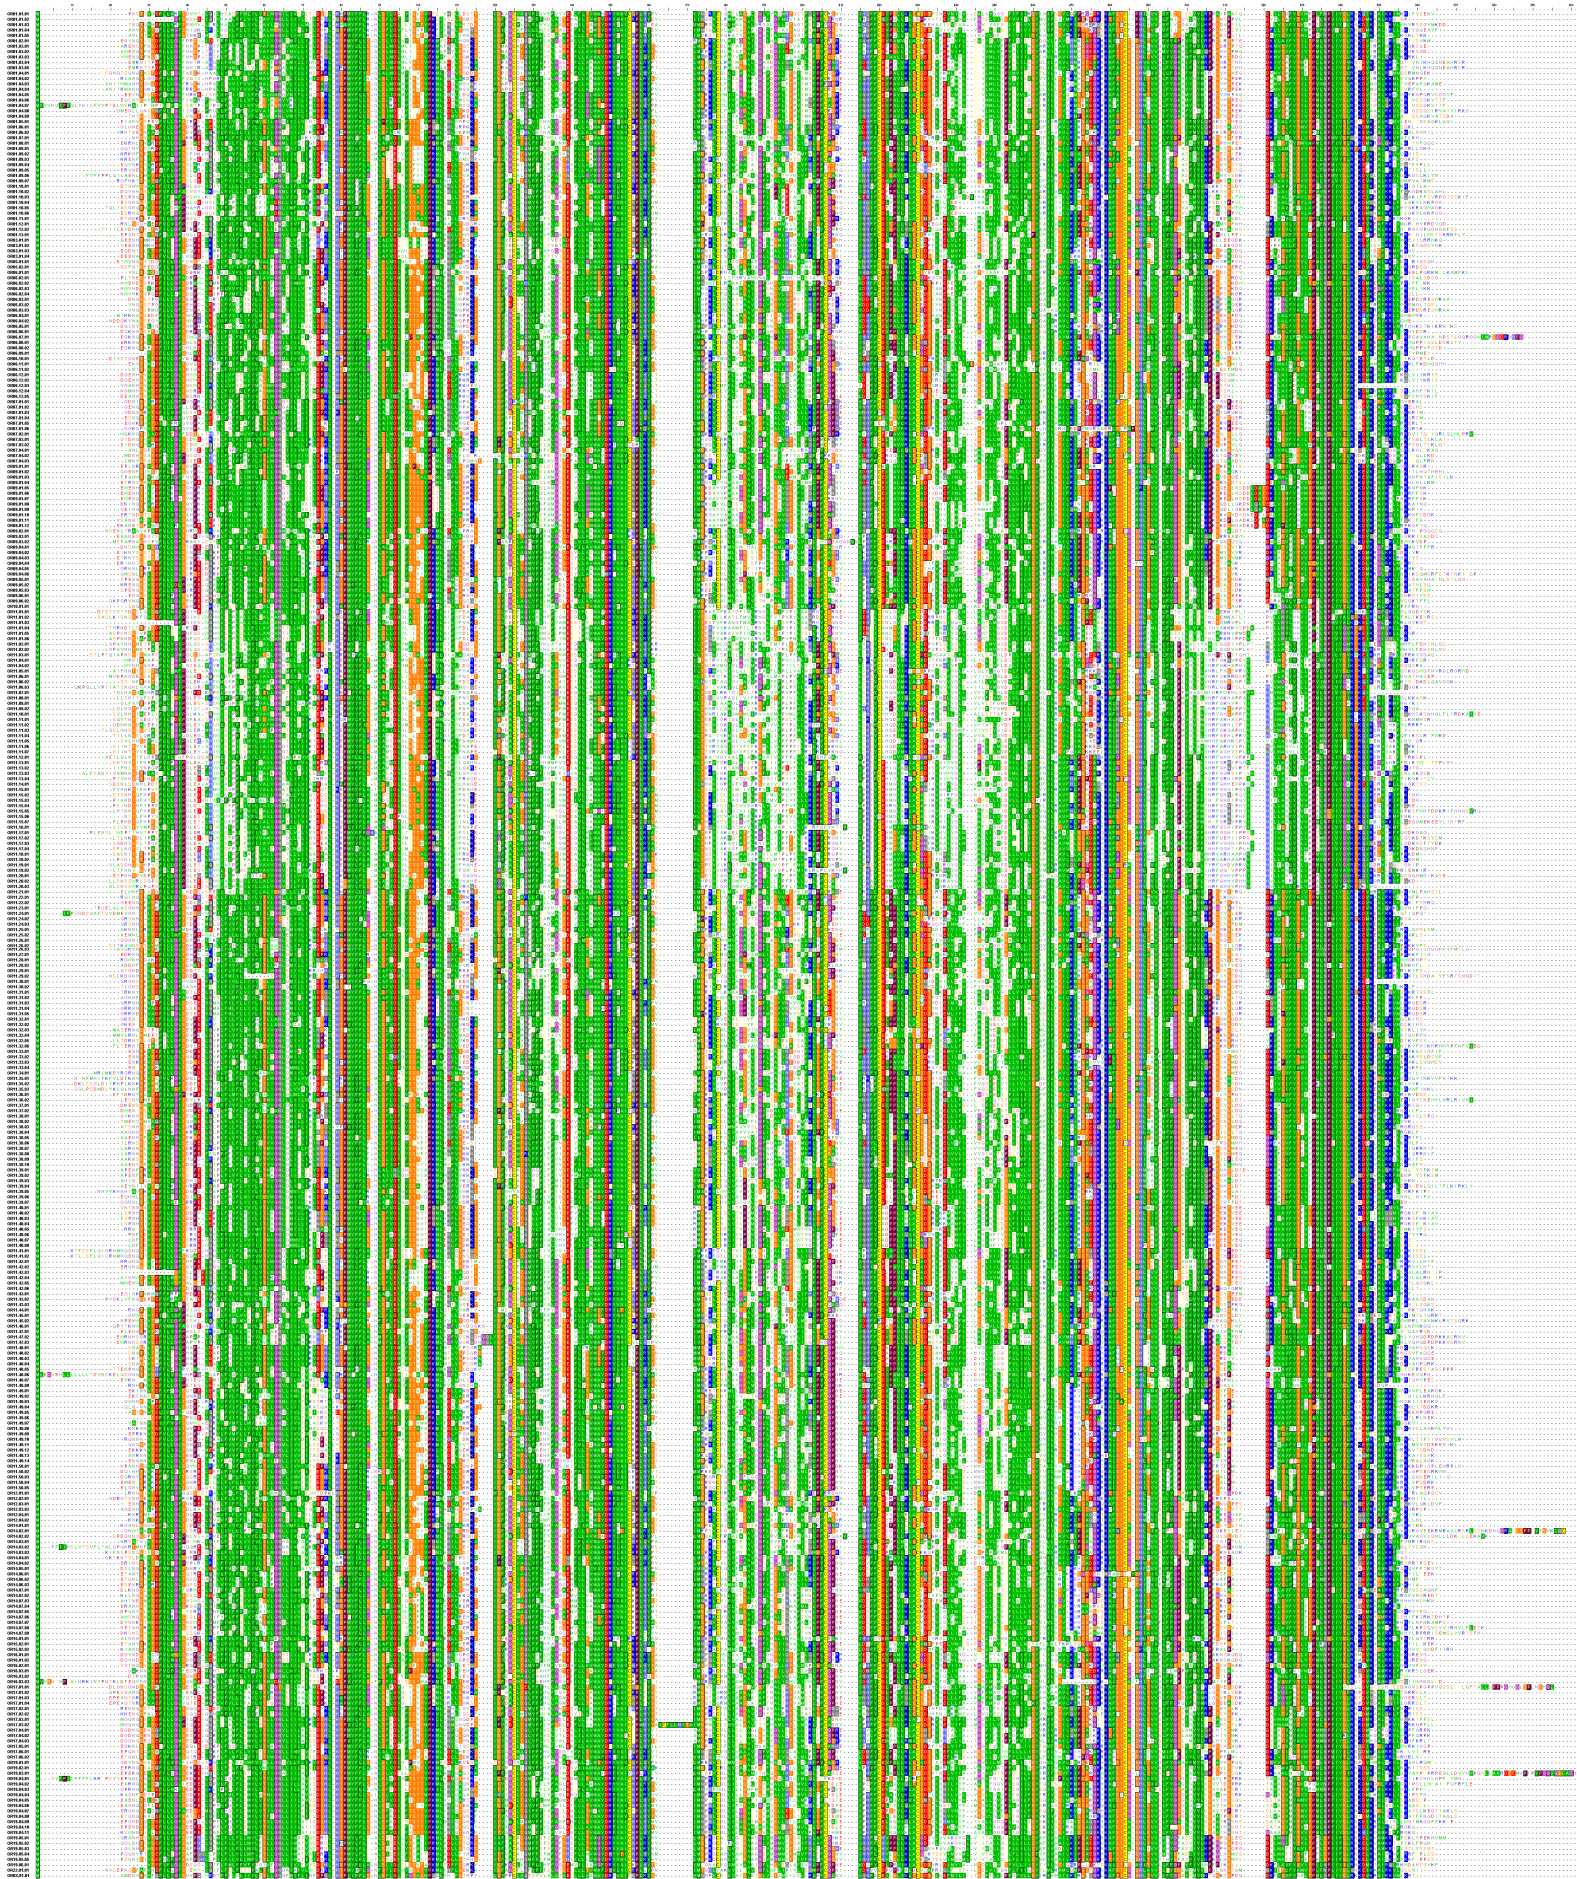

TM1 IC1 TM2 EC1 \* TM3 \* IC2 TM4 \* EC2 \* TM5 IC3 \* TM6 EC3 TM7

Supplement: gb-2001-2-6-research0018-S2.pdf [file gb-2001-2-6-research0018-S2.pdf]

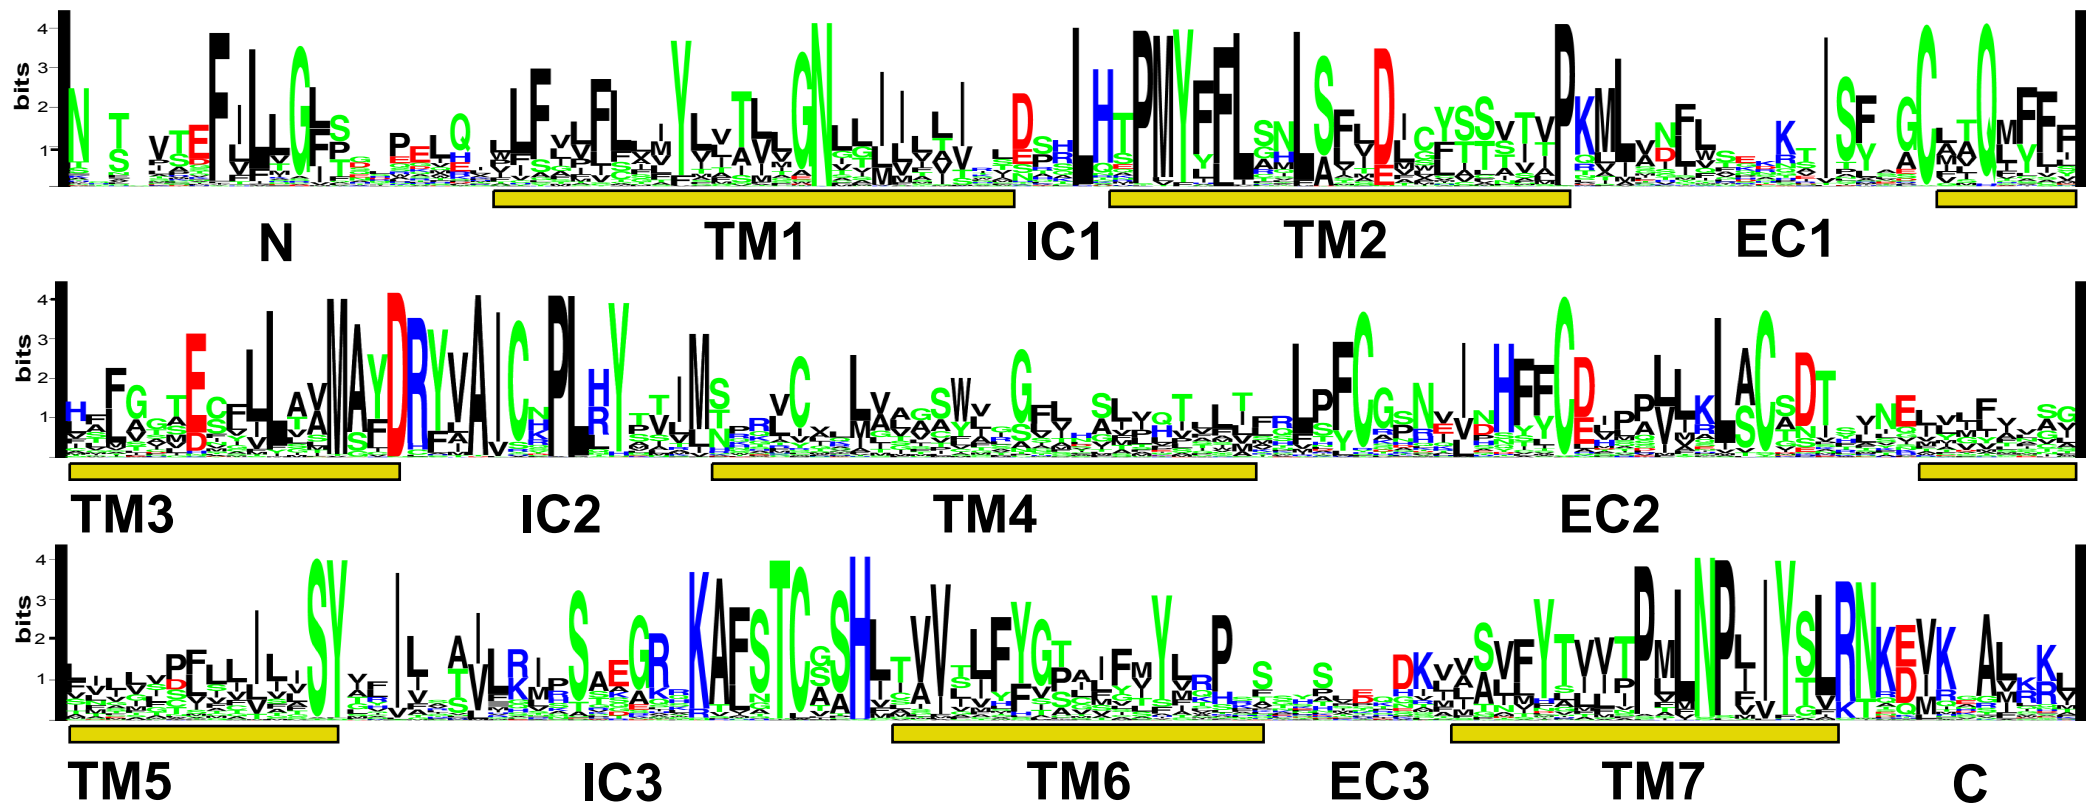

Supplement: gb-2001-2-6-research0018-S3.pdf [file gb-2001-2-6-research0018-S3.pdf]

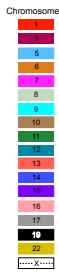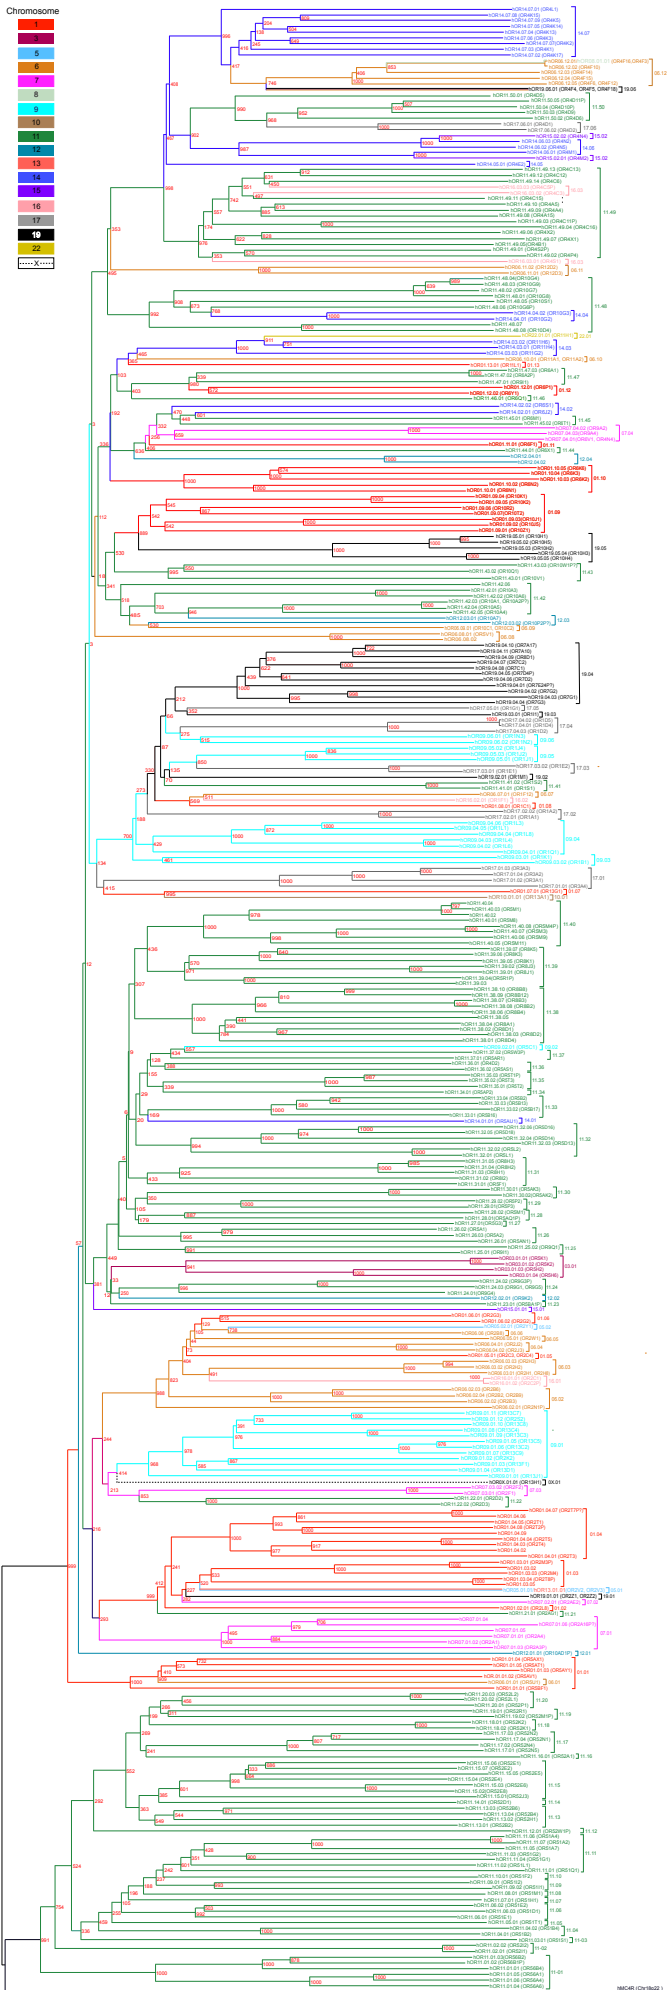

Supplement: gb-2001-2-6-research0018-S4.pdf [file gb-2001-2-6-research0018-S4.pdf]
